# Supplementary material for: Two-Step Thermal Transformation of Multilayer Graphene Using Polymeric Carbon Source Assisted by Physical Vapor Deposited Copper
Source: MDPI journal article supplement (doi:10.3390/ma16165603), 2023-08-13
Supplement: s1 [file s1]

# **Supplementary Information for**

## **Two-step thermal transformation of multilayer graphene using polymeric carbon source assisted by physical vapor deposited copper**

Yong Huang, Jiamiao Ni, Xiaoyu Shi, Yu Wang, Songsong Yao, Yue Liu\* and  
Tongxiang Fan\*

State Key Laboratory of Metal Matrix Composites, School of Materials Science and  
Engineering, Shanghai Jiao Tong University, Shanghai 200240, China

**\*Correspondence:** Yue Liu, [yliu23@sjtu.edu.cn](mailto:yliu23@sjtu.edu.cn) (Y.L.); Tongxiang Fan,  
[txfan@sjtu.edu.cn](mailto:txfan@sjtu.edu.cn) (T.F.)

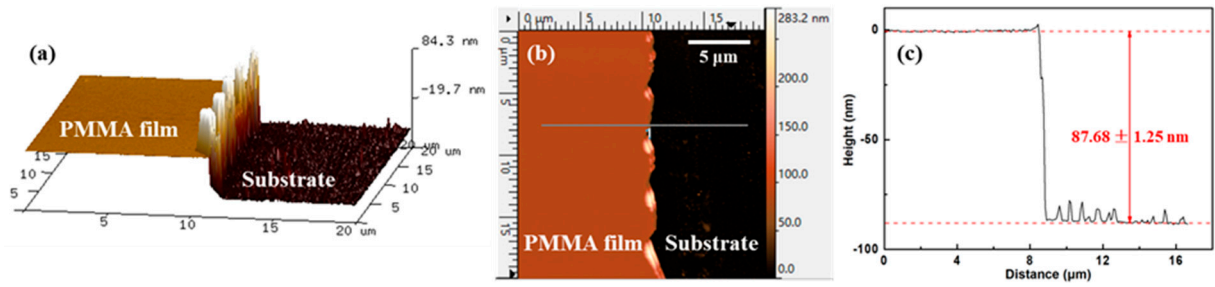

**Figure S1.** Thickness characterization of the PMMA thin film. (a) 3D and 2D AFM (b) image of the PMMA film scratched by a tweezer. (c) AFM height curve of the PMMA film corresponding to the “line 1” in (b).

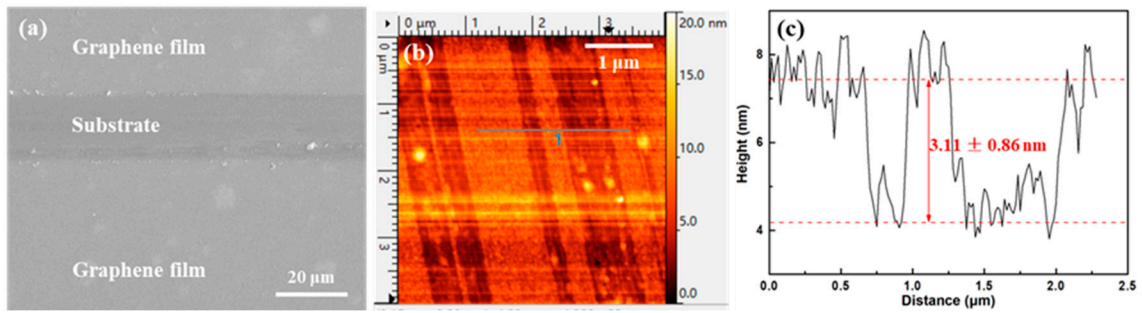

**Figure S2.** Characterization of the obtained multilayer graphene film. (a) SEM and (b) AFM height image of the graphene film scratched by a tweezer. (c) AFM height curve of the graphene film corresponding to the “line 1” in (b).
